# Supplementary material
Source: PubMed Central journal article supplement (PMC5349025)

Supplemental Figure 1, Turner et al.

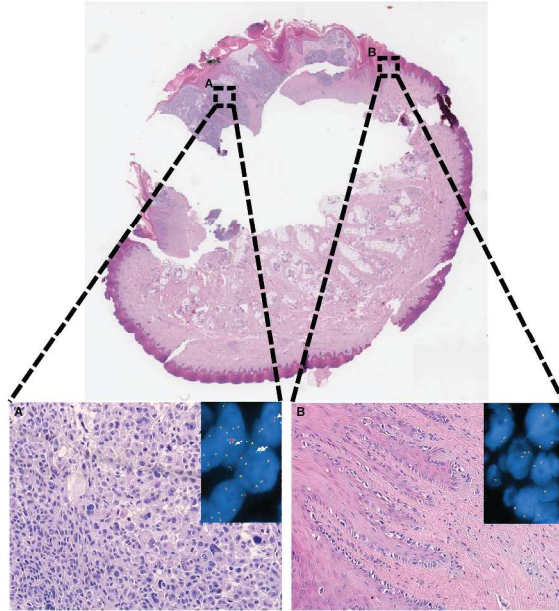

Supplemental Figure 2, Turner et al.

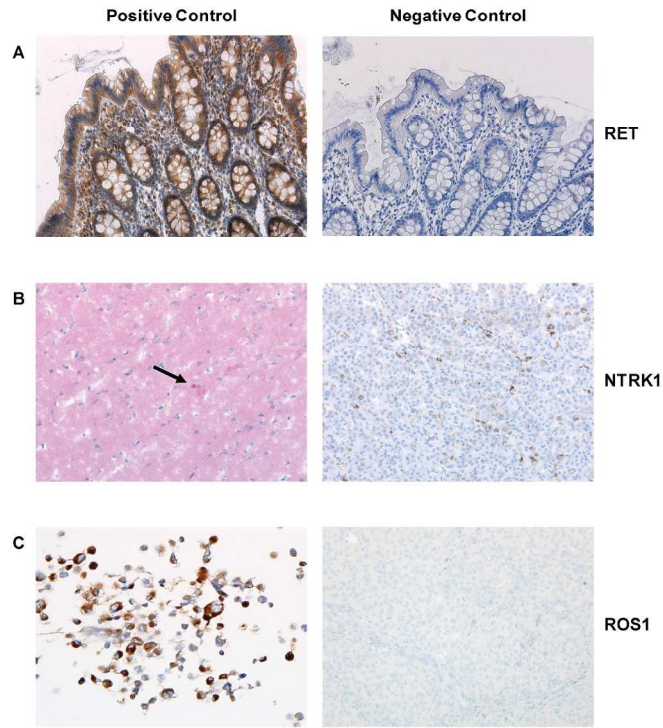

Supplemental Figure 3, Turner et al.

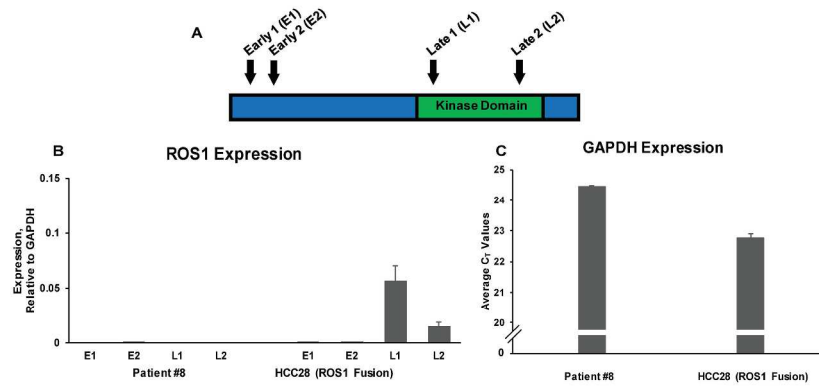

Supplement: NIHMS830890-supplement-Supp_Fig_S1-S3.pdf [file NIHMS830890-supplement-Supp_Fig_S1-S3.pdf]
